# Supplementary material for: Adherence to Hygiene Protocols and Doxycycline Therapy in Ameliorating Lymphatic Filariasis Morbidity in an Endemic Area Post-Interruption of Disease Transmission in Ghana
Source: PubMed Central journal article supplement (PMC11448491; doi:10.4269/ajtmh.24-0313), 2024-10-01
Supplement: tpmd240313.SD1.pdf [file tpmd240313.SD1.pdf]

## Supplementary figures 1

Figure 1a Stage progression (PP)

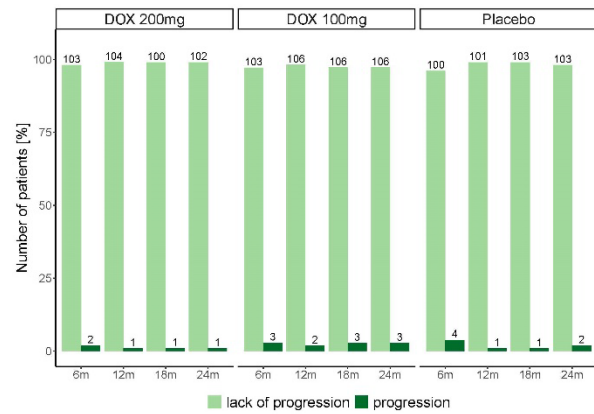

Figure 1b Stage improvement (PP)

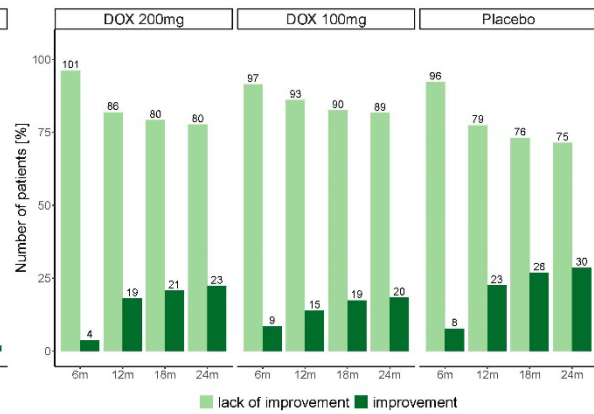

Figure 1a shows the number and percentage of participants (IPP collective) who showed LE stage progression at the different follow-up time points divided by the treatment groups. Figure 1b shows the same for the parameter LE stage improvement.

Supplementary table 1: List of study communities in Kassena Nankana East Municipal (KNEM)

| Kassena Nankana East Municipal (KNEM) |       |                                                                                                                                                                                                                                                                                             |                                                                                                                                                                                                                                                                                        |                                                                                                                                                                                                                                                                    |                                                                                                                                                                                                                                                                 |                                                                                                                                            |
|---------------------------------------|-------|---------------------------------------------------------------------------------------------------------------------------------------------------------------------------------------------------------------------------------------------------------------------------------------------|----------------------------------------------------------------------------------------------------------------------------------------------------------------------------------------------------------------------------------------------------------------------------------------|--------------------------------------------------------------------------------------------------------------------------------------------------------------------------------------------------------------------------------------------------------------------|-----------------------------------------------------------------------------------------------------------------------------------------------------------------------------------------------------------------------------------------------------------------|--------------------------------------------------------------------------------------------------------------------------------------------|
| Sub-districts                         |       |                                                                                                                                                                                                                                                                                             |                                                                                                                                                                                                                                                                                        |                                                                                                                                                                                                                                                                    |                                                                                                                                                                                                                                                                 |                                                                                                                                            |
| Communities                           | Pungu | Wuru                                                                                                                                                                                                                                                                                        | Manyoro                                                                                                                                                                                                                                                                                | Navrongo East                                                                                                                                                                                                                                                      | Vanania/<br>Kapania                                                                                                                                                                                                                                             | Biu/Sensa/Kologo                                                                                                                           |
|                                       |       | <ol style="list-style-type: none"> <li>1. Lower Talania</li> <li>2. Upper Talania</li> <li>3. Machoro</li> <li>4. Bavegnia</li> <li>5. Bawiu A&amp;B</li> <li>6. Wusugu</li> <li>7. Punyoro</li> <li>8. Yitonia</li> <li>9. Tekuru</li> <li>10. Dembasenia</li> <li>11. Badayoro</li> </ol> | <ol style="list-style-type: none"> <li>1. Gia-Bngania</li> <li>2. Gia-Jammagisongo</li> <li>3. Gia Kwosongo</li> <li>4. Gia- Nangwao</li> <li>5. Bonia 1 &amp; 2</li> <li>6. Lower Nangalikinia</li> <li>7. Upper Nangalikinia</li> <li>8. Wuru Central</li> <li>9. Korania</li> </ol> | <ol style="list-style-type: none"> <li>1. Wanjanja</li> <li>2. Sakonia</li> <li>3. Akumbisi</li> <li>4. Saabisi</li> <li>5. Dambisi</li> <li>6. Gumongu</li> <li>7. Gerebisi</li> <li>8. Natugnia-Dazongo</li> <li>9. Nyogsi</li> <li>10. Gware/ Chilla</li> </ol> | <ol style="list-style-type: none"> <li>1. Abepingo A &amp; B</li> <li>2. Akukongo</li> <li>3. Gayingo-Doba</li> <li>4. Akuka</li> <li>5. Akurugu-Dabo</li> <li>6. Agurum-aluku</li> <li>7. Korigo-Kandango</li> <li>8. Gingabnia</li> <li>9. Badania</li> </ol> | <ol style="list-style-type: none"> <li>1. Janania</li> <li>2. Vunania</li> <li>3. Gaani</li> <li>4. Kapania</li> <li>5. Tampola</li> </ol> |

Supplementary table 2: List of study communities in Kassena Nankana West District (KNW)

| Kassena Nankana West (KNW) |                                                                                                                                                                                                                                                                                                                                                                                                                   |                                                                                                                                                                                                                                                                                                       |                                                                                                                                                                                                                                                  |                                                                                                                                                                                                                                                                                                                                |                                                                                                                                                                                                                                                                                              |                                                                                                                                                                                                            |                                                                                                                                                                                                           |
|----------------------------|-------------------------------------------------------------------------------------------------------------------------------------------------------------------------------------------------------------------------------------------------------------------------------------------------------------------------------------------------------------------------------------------------------------------|-------------------------------------------------------------------------------------------------------------------------------------------------------------------------------------------------------------------------------------------------------------------------------------------------------|--------------------------------------------------------------------------------------------------------------------------------------------------------------------------------------------------------------------------------------------------|--------------------------------------------------------------------------------------------------------------------------------------------------------------------------------------------------------------------------------------------------------------------------------------------------------------------------------|----------------------------------------------------------------------------------------------------------------------------------------------------------------------------------------------------------------------------------------------------------------------------------------------|------------------------------------------------------------------------------------------------------------------------------------------------------------------------------------------------------------|-----------------------------------------------------------------------------------------------------------------------------------------------------------------------------------------------------------|
| Sub-districts              |                                                                                                                                                                                                                                                                                                                                                                                                                   |                                                                                                                                                                                                                                                                                                       |                                                                                                                                                                                                                                                  |                                                                                                                                                                                                                                                                                                                                |                                                                                                                                                                                                                                                                                              |                                                                                                                                                                                                            |                                                                                                                                                                                                           |
|                            | Mirigu                                                                                                                                                                                                                                                                                                                                                                                                            | Sirigu                                                                                                                                                                                                                                                                                                | Kandiga                                                                                                                                                                                                                                          | Chiana                                                                                                                                                                                                                                                                                                                         | Paga                                                                                                                                                                                                                                                                                         | Navio                                                                                                                                                                                                      | Nakolo                                                                                                                                                                                                    |
| <b>Communities</b>         | <ol style="list-style-type: none"> <li>1. Chengo</li> <li>2. Nayire</li> <li>3. Kassalingo</li> <li>4. Tikongo</li> <li>5. Abugzidone</li> <li>6. Gonum</li> <li>7. Gayingo</li> <li>8. Kumbusingo</li> <li>9. Pungubisi</li> <li>10. Alembilla</li> <li>11. Kansaam</li> <li>12. Woligum</li> <li>13. Azinzorka</li> <li>14. Aburuwasah</li> <li>15. Nyongo</li> <li>16. Zampengo</li> <li>17. Dorsum</li> </ol> | <ol style="list-style-type: none"> <li>1. Wuingo</li> <li>2. Abillateo</li> <li>3. Dazongo</li> <li>4. Puwellingo</li> <li>5. Tangasia</li> <li>6. Tidongo</li> <li>7. Bugsongo</li> <li>8. Basengo-Moo</li> <li>9. Nyango-lingo</li> <li>10. Basengo-Azuo-<br/>Done</li> <li>11. Amutanga</li> </ol> | <ol style="list-style-type: none"> <li>1. Azeadoma</li> <li>2. Agandaa</li> <li>3. Azuredone</li> <li>4. Tindongo</li> <li>5. Nindongo</li> <li>6. Kurugu</li> <li>7. Akamo</li> <li>8. Atiyorom</li> <li>9. Kaase</li> <li>10. Akamo</li> </ol> | <ol style="list-style-type: none"> <li>1. Gwernia</li> <li>2. Gaania</li> <li>3. Nyangania</li> <li>4. KalvioAbulu</li> <li>5. Kanania</li> <li>6. Kalvio-<br/>Aboenia</li> <li>7. Gugoro</li> <li>8. Saboro</li> <li>9. Adognia</li> <li>10. Wurunia</li> <li>11. Yidania</li> <li>12. Asunia</li> <li>13. Kafania</li> </ol> | <ol style="list-style-type: none"> <li>1. Kakungu<br/>North</li> <li>2. Chaina</li> <li>3. Batiu</li> <li>4. Bisao</li> <li>5. Baloo</li> <li>6. Kajello 1 &amp; 2</li> <li>7. Nania</li> <li>8. Zenga 1 &amp; 2</li> <li>9. Nabio</li> <li>10. Babile</li> <li>11. Gwaru 1&amp;2</li> </ol> | <ol style="list-style-type: none"> <li>1. Bagtua</li> <li>2. Kasili</li> <li>3. Navio<br/>Tazika</li> <li>4. Kazugu</li> <li>5. Badunu</li> <li>6. Sakaa</li> <li>7. Tigakuri</li> <li>8. Sanwo</li> </ol> | <ol style="list-style-type: none"> <li>1. Nakolo<br/>Central</li> <li>2. Banyono</li> <li>3. Kuliya</li> <li>4. Nakolo<br/>Tazika</li> <li>5. Boania</li> <li>6. Buburu-yuu</li> <li>7. Bugani</li> </ol> |

Supplementary table 3a

## Additional baseline data – demographics

|                         |                               |       | DOX 200mg   | DOX 100mg   | Placebo    | Total       | <i>p-value</i>            |
|-------------------------|-------------------------------|-------|-------------|-------------|------------|-------------|---------------------------|
| <b>Marital Status</b>   | Never married                 | N (%) | 1 (0.9%)    | 2 (1.7%)    | 8 (6.7%)   | 11 (3.1%)   | <b>0.0264<sup>a</sup></b> |
|                         | Currently married             | N (%) | 67 (57.3%)  | 72 (60%)    | 82 (68.9%) | 221 (62.1%) |                           |
|                         | Separated                     | N (%) | 1 (0.9%)    | 2 (1.7%)    | 0 (0%)     | 3 (0.8%)    |                           |
|                         | Divorced                      | N (%) | 5 (4.3%)    | 3 (2.5%)    | 2 (1.7%)   | 10 (2.8%)   |                           |
|                         | Widowed                       | N (%) | 43 (36.8%)  | 41 (34.2%)  | 27 (22.7%) | 111 (31.2%) |                           |
| <b>Married</b>          | no                            | N (%) | 50 (42.7%)  | 48 (40%)    | 37 (31.1%) | 135 (37.9%) | <b>0.1557<sup>a</sup></b> |
|                         | yes                           | N (%) | 67 (57.3%)  | 72 (60%)    | 82 (68.9%) | 221 (62.1%) |                           |
| <b>Main work status</b> | Paid work                     | N (%) | 1 (0.9%)    | 2 (1.7%)    | 3 (2.5%)   | 6 (1.7%)    | <b>0.7293<sup>a</sup></b> |
|                         | Self-employed                 | N (%) | 115 (98.3%) | 113 (94.2%) | 113 (95%)  | 341 (95.8%) |                           |
|                         | Non-paid work                 | N (%) | 0 (0%)      | 1 (0.8%)    | 0 (0%)     | 1 (0.3%)    |                           |
|                         | Student                       | N (%) | 0 (0%)      | 0 (0%)      | 2 (1.7%)   | 2 (0.6%)    |                           |
|                         | Keeping house/<br>homemaker   | N (%) | 0 (0%)      | 1 (0.8%)    | 0 (0%)     | 1 (0.3%)    |                           |
|                         | Retired                       | N (%) | 1 (0.9%)    | 1 (0.8%)    | 0 (0%)     | 2 (0.6%)    |                           |
|                         | Unemployed<br>(health reason) | N (%) | 0 (0%)      | 1 (0.8%)    | 0 (0%)     | 1 (0.3%)    |                           |
|                         | Unemployed<br>(other reasons) | N (%) | 0 (0%)      | 1 (0.8%)    | 1 (0.8%)   | 2 (0.6%)    |                           |

<sup>a</sup> Fishers exact test

Supplementary table 3b

Additional baseline data - Participants characteristics

|                                                                                                  |                                    |       | DOX 200mg  | DOX 100mg  | Placebo    | Total       | <i>p-value</i>            |
|--------------------------------------------------------------------------------------------------|------------------------------------|-------|------------|------------|------------|-------------|---------------------------|
| <b>LE staging right leg</b>                                                                      | 0 - No abnormality                 | N (%) | 42 (35.9%) | 44 (36.7%) | 47 (39.5%) | 133 (37.4%) | <i>n.d.</i>               |
|                                                                                                  | 1 - Swelling is reversible         | N (%) | 1 (0.9%)   | 2 (1.7%)   | 2 (1.7%)   | 5 (1.4%)    |                           |
|                                                                                                  | 2 - Swelling is not reversible     | N (%) | 42 (35.9%) | 46 (38.3%) | 35 (29.4%) | 123 (34.6%) |                           |
|                                                                                                  | 3 - Presence of shallow skin folds | N (%) | 31 (26.5%) | 27 (22.5%) | 32 (26.9%) | 90 (25.3%)  |                           |
|                                                                                                  | 5 - Presence of deep skin folds    | N (%) | 0 (0%)     | 0 (0%)     | 1 (0.8%)   | 1 (0.3%)    |                           |
|                                                                                                  | 6 - Presence of mossy lesions      | N (%) | 1 (0.9%)   | 1 (0.8%)   | 2 (1.7%)   | 4 (1.1%)    |                           |
| <b>LE staging Left leg</b>                                                                       | 0 - No abnormality                 | N (%) | 49 (41.9%) | 49 (40.8%) | 51 (42.9%) | 149 (41.9%) | <i>n.d.</i>               |
|                                                                                                  | 1 - Swelling is reversible         | N (%) | 2 (1.7%)   | 1 (0.8%)   | 2 (1.7%)   | 5 (1.4%)    |                           |
|                                                                                                  | 2 - Swelling is not reversible     | N (%) | 43 (36.8%) | 51 (42.5%) | 32 (26.9%) | 126 (35.4%) |                           |
|                                                                                                  | 3 - Presence of shallow skin folds | N (%) | 23 (19.7%) | 17 (14.2%) | 34 (28.6%) | 74 (20.8%)  |                           |
|                                                                                                  | 6 - Presence of mossy lesions      | N (%) | 0 (0%)     | 2 (1.7%)   | 0 (0%)     | 2 (0.6%)    |                           |
| <b>Last ADL attack<sup>e</sup><br/>(months before V1)</b>                                        | N                                  |       | 112        | 119        | 118        | 349         | <i>0.4815<sup>c</sup></i> |
|                                                                                                  | median, iqr                        |       | 14; 11     | 14; 12     | 15; 12     | 14; 12      |                           |
|                                                                                                  | 95% CI median                      |       | [14; 15]   | [14; 15]   | [14; 15]   | [14; 15]    |                           |
|                                                                                                  | min - max                          |       | 2-89       | 2-76       | 2-64       | 2-89        |                           |
| <b>Number of attacks within the last year (all patients)</b>                                     | N                                  |       | 101        | 103        | 108        | 312         | <i>0.9847<sup>c</sup></i> |
|                                                                                                  | median, iqr                        |       | 1; 1       | 1; 1       | 1; 1       | 1; 1        |                           |
|                                                                                                  | 95% CI median                      |       | [1; 1]     | [1; 1]     | [1; 1]     | [1; 1]      |                           |
|                                                                                                  | min - max                          |       | 0-6        | 0-6        | 0-9        | 0-9         |                           |
| <b>Duration of attacks (average within the last year (days)) (all patients)</b>                  | N                                  |       | 114        | 119        | 118        | 351         | <i>0.5065<sup>c</sup></i> |
|                                                                                                  | median, iqr                        |       | 5; 7       | 5; 5       | 5; 4       | 5; 5        |                           |
|                                                                                                  | 95% CI median                      |       | [4; 7]     | [4; 7]     | [4; 7]     | [5; 6]      |                           |
|                                                                                                  | min - max                          |       | 0-90       | 0-30       | 0-90       | 0-90        |                           |
| <b>Duration of attacks (average within the last year (days)) (only patients who had attacks)</b> | N                                  |       | 85         | 90         | 98         | 273         | <i>0.9906<sup>c</sup></i> |
|                                                                                                  | median, iqr                        |       | 7; 4       | 7; 6       | 7; 5       | 7; 5        |                           |
|                                                                                                  | 95% CI median                      |       | [5; 7]     | [6; 7]     | [5; 7]     | [7; 7]      |                           |
|                                                                                                  | min - max                          |       | 1-90       | 2-30       | 1-90       | 1-90        |                           |
| <b>Observer Assessed Cleanliness Score<sup>f</sup></b>                                           | N                                  |       | 117        | 120        | 119        | 356         | <i>0.6799<sup>c</sup></i> |
|                                                                                                  | median, iqr                        |       | 1; 0.2     | 1; 0.2     | 1; 0.3     | 1; 0.3      |                           |
|                                                                                                  | 95% CI median                      |       | [0.8; 1]   | [1; 1]     | [0.9; 1]   | [1; 1]      |                           |
|                                                                                                  | min - max                          |       | 0.3-1      | 0.3-1      | 0.3-1      | 0.3-1       |                           |

|                                                                                                                                                                                                 |               | DOX 200mg    | DOX 100mg    | Placebo      | Total        | <i>p-value</i>            |
|-------------------------------------------------------------------------------------------------------------------------------------------------------------------------------------------------|---------------|--------------|--------------|--------------|--------------|---------------------------|
| <b>Observer Assessed Skin Score<sup>f</sup></b>                                                                                                                                                 | N             | 117          | 120          | 119          | 356          | <i>0.4262<sup>c</sup></i> |
|                                                                                                                                                                                                 | median, iqr   | 0.9; 0.2     | 0.9; 0.2     | 0.9; 0.2     | 0.9; 0.2     |                           |
|                                                                                                                                                                                                 | 95% CI median | [0.9; 0.9]   | [0.9; 0.9]   | [0.8; 0.9]   | [0.9; 0.9]   |                           |
|                                                                                                                                                                                                 | min - max     | 0.7-1        | 0.6-1        | 0.4-1        | 0.4-1        |                           |
| <b>Self Assessed Hygiene Score<sup>f</sup></b>                                                                                                                                                  | N             | 103          | 101          | 102          | 306          | <i>0.0133<sup>c</sup></i> |
|                                                                                                                                                                                                 | median, iqr   | 0.57; 0.05   | 0.57; 0.05   | 0.57; 0.05   | 0.57; 0.05   |                           |
|                                                                                                                                                                                                 | 95% CI median | [0.57; 0.57] | [0.57; 0.62] | [0.57; 0.57] | [0.57; 0.57] |                           |
|                                                                                                                                                                                                 | min - max     | 0.52-0.81    | 0.52-0.90    | 0.43-0.76    | 0.43-0.90    |                           |
| <b>WHODAS 2.0 Physical LF Sub-score (Items S1, S7-S9)</b>                                                                                                                                       | N             | 117          | 120          | 119          | 356          | <i>0.6116<sup>c</sup></i> |
|                                                                                                                                                                                                 | median, iqr   | 8.3; 10.4    | 6.3; 9.4     | 6.3; 8.3     | 6.3; 9.4     |                           |
|                                                                                                                                                                                                 | 95% CI median | [6.25; 8.34] | [6.25; 8.34] | [6.25; 8.34] | [6.25; 8.34] |                           |
|                                                                                                                                                                                                 | min - max     | 0-33.3       | 0-31.2       | 0-25         | 0-33.3       |                           |
| <b>WHODAS 2.0 Not Physical LF Sub-Score (Items S2-S6, S10-S12)</b>                                                                                                                              | N             | 117          | 120          | 119          | 356          | <i>0.88<sup>c</sup></i>   |
|                                                                                                                                                                                                 | median, iqr   | 16.7; 16.7   | 14.6; 18.8   | 14.6; 16.7   | 14.6; 18.8   |                           |
|                                                                                                                                                                                                 | 95% CI median | [12.5; 20.8] | [12.5; 16.7] | [12.5; 18.7] | [12.5; 16.7] |                           |
|                                                                                                                                                                                                 | min - max     | 0-66.6       | 0-52.1       | 0-54.2       | 0-66.6       |                           |
| <b>H1: Overall, in the past 30 days, how many days were these difficulties present?</b>                                                                                                         | N             | 117          | 120          | 119          | 356          | <i>0.8318<sup>c</sup></i> |
|                                                                                                                                                                                                 | median, iqr   | 21; 26       | 24; 25       | 30; 24       | 22.5; 25     |                           |
|                                                                                                                                                                                                 | 95% CI median | [11; 30]     | [16; 30]     | [14; 30]     | [16; 30]     |                           |
|                                                                                                                                                                                                 | min - max     | 0-30         | 0-30         | 0-30         | 0-30         |                           |
| <b>H2: In the past 30 days, for how many days were you totally unable to carry out your usual activities or work because of any health condition?</b>                                           | N             | 117          | 120          | 119          | 356          | <i>0.4095<sup>c</sup></i> |
|                                                                                                                                                                                                 | median, iqr   | 0; 3         | 0; 3         | 0; 2         | 0; 2         |                           |
|                                                                                                                                                                                                 | 95% CI median | [0; 0]       | [0; 0]       | [0; 0]       | [0; 0]       |                           |
|                                                                                                                                                                                                 | min - max     | 0-15         | 0-14         | 0-14         | 0-15         |                           |
| <b>H3: In the past 30 days, not counting the days that you were totally unable, for how many days did you cut back or reduce your usual activities or work because of any health condition?</b> | N             | 117          | 120          | 119          | 356          | <i>0.7443<sup>c</sup></i> |
|                                                                                                                                                                                                 | median, iqr   | 21; 27       | 18; 27       | 20; 26       | 20; 27       |                           |
|                                                                                                                                                                                                 | 95% CI median | [7; 27]      | [14; 27]     | [10; 30]     | [14; 26]     |                           |
|                                                                                                                                                                                                 | min - max     | 0-30         | 0-30         | 0-30         | 0-30         |                           |

<sup>a</sup> Fishers exact test    <sup>b</sup> ANOVA    <sup>c</sup> Kruskal-Wallis test    <sup>d</sup> Chi-square test

<sup>e</sup> For some participants it was very difficult to recall the history of ADL attacks. Therefore, some questions were not answered.

<sup>f</sup> For “overall hygiene” did the assessor evaluate whether the legs were generally well washed and cared for. To answer this question, the assessor had several other questions available within the questionnaire, which have been summarized as scores in this table.

Supplementary table 4

AEs reported between treatment end and 4 month follow-up

| Adverse event<br>(MedDRA "Preferred Terms") | DOX 200            | DOX 100           | Placebo            | Total      |
|---------------------------------------------|--------------------|-------------------|--------------------|------------|
| Headache                                    | 23 (42.6%)         | 21 (38.9%)        | 10 (18.5)          | 54         |
| Pain                                        | 16 (31.4%)         | 18 (35.3%)        | 17 (33.3%)         | 51         |
| Malaria                                     | 17 (43.6%)         | 9 (23.1%)         | 13 (33.3%)         | 39         |
| Pain in extremity                           | 10 (26.3%)         | 9 (23.7%)         | 19 (50%)           | 38         |
| Back pain                                   | 14 (58.3%)         | 3 (12.5%)         | 7 (29.2%)          | 24         |
| Diarrhoea                                   | 8 (40%)            | 5 (25%)           | 7 (35%)            | 20         |
| Abdominal discomfort/pain                   | 9 (60%)            | 2 (13.3%)         | 4 (26.7%)          | 15         |
| Arthralgia                                  | 7 (63.6%)          | 1 (9.1%)          | 3 (27.3%)          | 11         |
| Cough                                       | 4 (36.4%)          | 6 (64.5%)         | 1 (9.1%)           | 11         |
| Chest pain                                  | 3 (37.5%)          | 3 (37.5%)         | 2 (25%)            | 8          |
| Hypertension                                | 2 (33.3%)          | 3 (50%)           | 1 (16.7%)          | 6          |
| Influenza                                   | 2 (33.3%)          | 1 (16.7%)         | 3 (50%)            | 6          |
| Pruritus                                    | 2 (40%)            | 2 (40%)           | 1 (20%)            | 5          |
| Dizziness                                   | 2 (50%)            | 1 (25%)           | 1 (25%)            | 4          |
| Gastroenteritis                             | 2 (50%)            | 2 (50%)           | 0                  | 4          |
| Pyrexia                                     | 2 (66.7%)          | 0                 | 1 (33.3%)          | 3          |
| Other*                                      | 12 (33.3%)         | 13 (36.1%)        | 11 (30.6%)         | 36         |
| <b>Total</b>                                | <b>135 (40.3%)</b> | <b>99 (29.6%)</b> | <b>101 (30.1%)</b> | <b>335</b> |

\*Other – occurrence < 3 (Candida infection, Catarrh, Decreased appetite, Eye pain, Gastritis, Peripheral swelling, Skin ulcer, Asthenia, Carbuncle, Cerebrovascular accident, Chills, Contusion, Face injury, Flank pain, Furuncle, Hypoaesthesia, Infection, Limb injury, Lymphangitis, Migraine, Muscle spasms, Musculoskeletal stiffness, Pain in jaw, Rash, Stress, Toothache, Upper limb fracture, Varicella, Wound)
